# LEARNING EPISTATIC GENE INTERACTIONS FROM PERTURBATION SCREENS

KIERAN ELMES<sup>1</sup>, FABIAN SCHMICH<sup>2,3</sup>, EWA SZCZUREK<sup>4</sup>, JEREMY JENKINS<sup>5</sup>,  
NIKO BEERENWINKEL<sup>2,3,✉</sup>, AND ALEX GAVRYUSHKIN<sup>1,✉</sup>

**ABSTRACT.** The treatment of complex diseases often relies on combinatorial therapy, a strategy where drugs are used to target multiple genes simultaneously. Promising candidate genes for combinatorial perturbation often constitute epistatic genes, i.e., genes which contribute to a phenotype in a non-linear fashion. Experimental identification of the full landscape of genetic interactions by perturbing all gene combinations is prohibitive due to the exponential growth of testable hypotheses. Here we present a model for the inference of pairwise epistatic, including synthetic lethal, gene interactions from siRNA-based perturbation screens. The model exploits the combinatorial nature of siRNA-based screens resulting from the high numbers of sequence-dependent off-target effects, where each siRNA apart from its intended target knocks down hundreds of additional genes. We show that conditional and marginal epistasis can be estimated as interaction coefficients of regression models on perturbation data. We compare two methods, namely **glinternet** and **xyz**, for selecting non-zero effects in high dimensions as components of the model, and make recommendations for the appropriate use of each. For data simulated from real RNAi screening libraries, we show that **glinternet** successfully identifies epistatic gene pairs with high accuracy across a wide range of relevant parameters for the signal-to-noise ratio of observed phenotypes, the effect size of epistasis and the number of observations per double knockdown. **xyz** is also able to identify interactions from lower dimensional data sets (fewer genes), but is less accurate for many dimensions. Higher accuracy of **glinternet**, however, comes at the cost of longer running time compared to **xyz**. The general model is widely applicable and allows mining the wealth of publicly available RNAi screening data for the estimation of epistatic interactions between genes. As a proof of concept, we apply the model to search for interactions, and potential targets for treatment, among previously published sets of siRNA perturbation screens on various pathogens. The identified interactions include both known epistatic interactions as well as novel findings.

<sup>1</sup> DEPARTMENT OF COMPUTER SCIENCE, UNIVERSITY OF OTAGO, DUNEDIN, NEW ZEALAND

<sup>2</sup> DEPARTMENT OF BIOSYSTEMS SCIENCE AND ENGINEERING, ETH ZURICH, BASEL, SWITZERLAND

<sup>3</sup> SIB SWISS INSTITUTE OF BIOINFORMATICS, BASEL, SWITZERLAND

<sup>4</sup> INSTITUTE OF INFORMATICS, UNIVERSITY OF WARSAW, WARSAW, POLAND

<sup>5</sup> NOVARTIS INSTITUTES FOR BIOMEDICAL RESEARCH, CAMBRIDGE, MASSACHUSETTS, UNITED STATES

*E-mail addresses:* [kelmes@cs.otago.ac.nz](mailto:kelmes@cs.otago.ac.nz), [✉ niko.beerenwinkel@bsse.ethz.ch](mailto:niko.beerenwinkel@bsse.ethz.ch), [✉ alex@biods.org](mailto:alex@biods.org).

## INTRODUCTION

Genetic interactions are also referred to as epistasis, a term that originates from the field of statistical genetics and describes genetic contributions to the phenotype that are not linear in the effects of single genes (Wright 1932; Cordell 2002). Considering two genes at a time, positive and negative epistasis refer to a greater and smaller effect, respectively, of the double mutant genotype than expected from the two single mutant genotypes relative to the wild type. In genetics, the phenotype of primary interest is the reproductive success of a cell, which is commonly termed fitness (Orr 2009). In this context, a fitness landscape is the mapping of each combination of possible configurations of gene mutations to a fitness phenotype (de Visser, Cooper, and Elena 2011).

The knowledge of fitness landscapes is highly relevant for personalized disease treatment (Kaelin 2005). In cancer, for example, genetic aberrations result in cells with increased somatic fitness, for instance, by evading apoptosis or gaining the ability to metastasise. This increase subsequently promotes post-metastatic tumour development (Hanahan and Weinberg 2011). A major challenge in cancer therapy is the fact that many genes with driving mutations cannot be adequately targeted for inhibition due to toxic side effects and rapid development of drug resistance (Force and Kolaja 2011; Holohan et al. 2013). To overcome this challenge, a strategy based on the inhibition of genes that interact with genes with cancer driving alterations was proposed (Ashworth, Lord, and Reis-Filho 2011). This strategy is based on the principle of synthetic lethality (Kaelin 2005; Jerby-Arnon et al. 2014; O’Neil, Bailey, and Hieter 2017), the extreme case of negative epistasis, where single mutants are compatible with cell viability but the double mutant results in cell death. Identifying synthetic lethal gene interactions allows targeting cancer cells in which one of the two genes is mutated, by using drugs that affect the other. In the presence of this drug, the cancer cell lineage will no longer be viable (Chan and Giaccia 2011).

The identification of fitness landscapes is however a very challenging task, simply due to the exponential growth of the space of interactions. For yeast, for example, it has been shown to be feasible to experimentally perform 75% of all pairwise knockouts (Costanzo et al. 2010). However, in humans, with approximately 20,000 protein-coding genes, this would constitute to almost 200 million experiments to test all pairwise interactions. An approach that has been successfully applied to identify synthetic lethality *in vitro* is large-scale perturbation screening of human cancer cell lines using RNA interference (Steckel et al. 2012; Laufer et al. 2013; McDonald et al. 2017; DepMap 2020). However, this strategy only allows cataloguing synthetic lethal gene pairs where one gene is always specific to the screened cell line. While these methods may be sufficient for the identification of a few promising targets for cancer therapy, they do not allow us to estimate general pairwise gene interactions at the human exome scale.

Short-interfering RNAs (siRNAs), the reagents used in RNAi perturbation screening, exhibit strong off-target effects, which results in high numbers of false positives rendering the perturbations hard to interpret (Jackson et al. 2006). While this is usually conceived as a problem, here we take advantage of this property for the estimation of genetic interactions (Schmich et al. 2015; Srivatsa et al. 2018; Tiurnyn and Szczurek 2019). We propose a novel approach for the second order approximation of a human fitness landscape by inferring the fitness of single gene perturbations and their pairwise interactions from RNAi screening data (Figure 1). Our approach is not restricted to interactions with mutant genes of a specific cell line or explicit double knockdowns. We leverage the combinatorial nature of sequence-dependent off-target effects of siRNAs, where each siRNA in addition to the intended on-target knocks down hundreds of additional genes simultaneously. Not distinguishing between on- and off-targeted genes, we consider each siRNA knockdown as a combinatorial knockdown of multiple genes. Hence, every large-scale RNAi screen, though unintended, contains large numbers of observations of high-order combinatorial knockdowns and provides a rich source for the extraction of pairwise epistasis. These off-target effects have previously been used to improve inference of signalling pathways among a small number (on the order of a dozen) genes (Srivatsa et al. 2018; Tiurnyn and Szczurek 2019). Here, however, we attempt to use it to discover epistatic gene pairs in a genome-wide fashion (i.e. among tens of thousands of genes). Our approach is formulated as a regularized regression model. It can also be deployed for the estimation of epistasis from phenotypes other than fitness, such as for instance phenotypes that measure the activity of disease-relevant pathways, e.g. for pathogen entry (Rämö et al. 2014), TGF $\beta$ -signalling (Schultz et al. 2011), or WNT-signalling (Tang et al. 2008). Long term, the identification of disease-relevant epistatic gene pairs may allow the design or re-purposing of agents for combinatorial therapy with the potential to improve the efficacy of drugs.

In solving this model, we adapt two recent statistical learning methods, namely **glinternet** (Lim and Hastie 2015) and **xyz** (Thanei, Meinshausen, and Shah 2018) to select genes and gene-pairs with non-zero effects on fitness, and evaluate both models on simulated data from real RNAi libraries. We vary the signal-to-noise ratios, number of true gene-gene interactions, number of observations per double knockdown and effect size for epistasis. We find that, within ranges that are realistic to real RNAi data, both approaches are capable of inferring pairwise epistasis with favourable precision and sensitivity when only a small number of genes are involved in interactions. In several tests **glinternet** continued to infer correct interactions up to several thousand genes, however the run time prohibits more thorough testing. To demonstrate the model on a real data set, we use the perturbation data from (Rämö et al. 2014). Using **glinternet**, we search for interactions between kinases, and report the most significant results.

Our simulations are performed using R, and the source code is available at: <https://github.com/bioDS/xyz-simulation>.

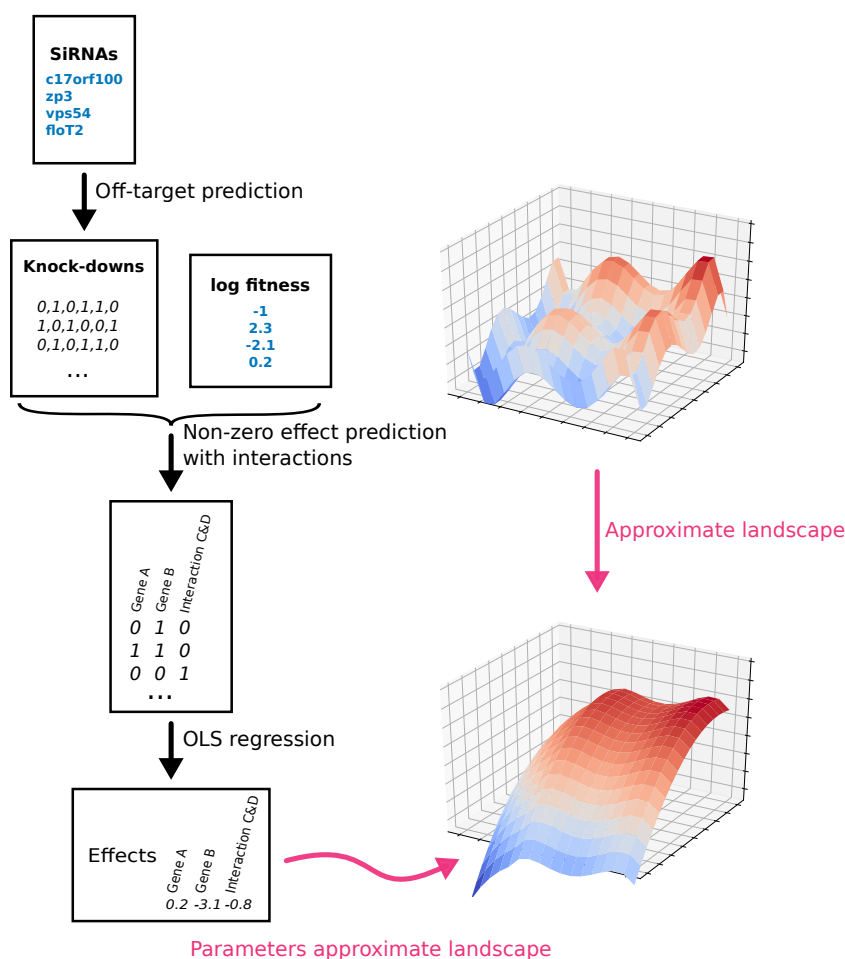

**Figure 1.** RNAi fitness landscape model. Black arrows indicate outputs that are actually produced. Red arrows indicate theoretical output.

## 1. METHODS

We fix the binary alphabet  $\Sigma = \{0, 1\}$  representing the two possible states in a perturbation experiment. The value zero denotes the normal state of the gene (unperturbed wild type), whereas the value one indicates knockdown of the gene (perturbed). For  $p$  genes we denote by  $\Sigma^p$  the set of binary sequences of length  $p$ , indicating the perturbation status of each gene. Any subset  $\mathcal{P} \subseteq \Sigma^p$  is called a perturbation space and its elements are called perturbation types. If the perturbations are genetic mutations, then the perturbation types are genotypes.

**1.1. Fitness landscapes and epistasis.** In the following, we focus on fitness landscapes, but would like to note that the theory also holds for any mapping of perturbation type to phenotype. A fitness landscape is a mapping  $f : \mathcal{P} \rightarrow \mathbb{R}_+$  from perturbation type space to non-negative fitness values. Genetic interactions are a property of the underlying fitness landscape (Beerenwinkel, Pachter, and Sturmfels 2007). For  $p = 2$  genes, the perturbation type space  $\mathcal{P} = \{0, 1\}^2$  contains the wild-type 00, two single perturbations 01 and 10, and the double

perturbation 11. The fitness landscape  $f : \{0, 1\}^2 \rightarrow \mathbb{R}_+$  can be written as

$$\begin{aligned} f(0, 0) &= \beta_0 \\ f(1, 0) &= \beta_0 + \beta_1 \\ f(0, 1) &= \beta_0 + \beta_2 \\ f(1, 1) &= \beta_0 + \beta_1 + \beta_2 + \beta_{1,2} \end{aligned}$$

for parameters  $\beta_i \in \mathbb{R}$ .  $\beta_0$  is called the bias,  $\beta_1$  and  $\beta_2$  main effects, and  $\beta_{1,2}$  the interaction. Epistasis is defined as

$$(1) \quad \varepsilon = f(0, 0) + f(1, 1) - f(0, 1) - f(1, 0)$$

It measures the deviation of the fitness of the double knockdown from the expectation under a linear fitness model in the main effects. We see that  $\varepsilon = \beta_{1,2}$ .

1.1.1. *Fitness landscape model.* It is challenging to generalize the notion of epistasis (Equation 1), because in higher dimensions, many more types of genetic interactions exist (Beerenwinkel, Pachter, and Sturmfels 2007), even when restricting to pairwise interactions. In general, it will be impossible to estimate all interactions encoded in the fitness landscape reliably from data. In the following, we show how to assess marginal and conditional pairwise epistasis. For  $p \geq 1$  genes, we consider the Taylor expansion of the fitness landscape

$$(2) \quad f(x_1, \dots, x_p) = \beta_0 + \sum_i x_i \beta_i + \sum_{i < j} x_i x_j \beta_{i,j} + \sum_{i < j < k} x_i x_j x_k \beta_{i,j,k} + \dots$$

Ignoring interactions of order 3 and higher we obtain the more computationally tractable approximation:

$$(3) \quad f(x_1, \dots, x_p) \approx \beta_0 + \sum_i x_i \beta_i + \sum_{i < j} x_i x_j \beta_{i,j}$$

1.1.2. *Conditional epistasis.* For two genes  $i$  and  $j$  and a fixed set of background perturbations  $b = (x_1, \dots, x_{i-1}, x_{i+1}, \dots, x_{j-1}, x_{j+1}, \dots, x_p) \in \mathbb{R}_+^{p-2}$  we define conditional epistasis between gene  $i$  and  $j$  given  $b$  as

$$\begin{aligned} (4) \quad \varepsilon_{i,j|b} &= f(x_1, \dots, x_{i-1}, 0, x_{i+1}, \dots, x_{j-1}, 0, x_{j+1}, \dots, x_p) \\ &\quad + f(x_1, \dots, x_{i-1}, 1, x_{i+1}, \dots, x_{j-1}, 1, x_{j+1}, \dots, x_p) \\ &\quad - f(x_1, \dots, x_{i-1}, 1, x_{i+1}, \dots, x_{j-1}, 0, x_{j+1}, \dots, x_p) \\ &\quad - f(x_1, \dots, x_{i-1}, 0, x_{i+1}, \dots, x_{j-1}, 1, x_{j+1}, \dots, x_p) \end{aligned}$$

**Proposition 1.** *For the fitness landscape model (3), the interaction terms  $\beta_{i,j}$  are independent of  $b$  and equal to conditional epistasis, that is,  $\varepsilon_{i,j|b} = \beta_{i,j}$ .*

*Proof.* Without loss of generality, we can consider  $(i, j) = (1, 2)$ . Let  $b = (x_3, \dots, x_p)$ . In model (3) we have

$$\begin{aligned}
 (5) \quad \varepsilon_{1,2|b} &= f(0, 0, x_3, \dots, x_p) + f(1, 1, x_3, \dots, x_p) \\
 &\quad - f(1, 0, x_3, \dots, x_p) - f(0, 1, x_3, \dots, x_p) \\
 &= \beta_0 + \left( \beta_0 + \beta_1 + \beta_2 + \beta_{1,2} + \sum_{i>2} x_i \beta_{1,i} + \sum_{i>2} x_i \beta_{2,i} \right) \\
 &\quad - \left( \beta_0 + \beta_1 + \sum_{i>2} x_i \beta_{1,i} \right) - \left( \beta_0 + \beta_2 + \sum_{i>2} x_i \beta_{2,i} \right)
 \end{aligned}$$

All terms except the interaction  $\beta_{1,2}$  cancel out, therefore  $\varepsilon_{1,2|b} = \beta_{1,2}$ .  $\square$

1.1.3. *Marginal epistasis.* The marginal fitness landscape of genes  $i$  and  $j$  is

$$(6) \quad f_{i,j}(x_i, x_j) = \sum_{\{x_k \in \{0,1\} | k \neq i,j\}} f(x_1, \dots, x_p)$$

and marginal epistasis between genes  $i$  and  $j$  is the epistasis of the marginal fitness landscape,

$$(7) \quad \varepsilon_{i,j} = f_{i,j}(0, 0) + f_{i,j}(1, 1) - f_{i,j}(1, 0) - f_{i,j}(0, 1)$$

For example, for  $p = 3$  genes, marginal epistasis between gene 1 and 2 is

$$\begin{aligned}
 (8) \quad \varepsilon_{1,2} &= [f(0, 0, 0) + f(0, 0, 1)] + [f(1, 1, 0) + f(1, 1, 1)] \\
 &\quad - [f(1, 0, 0) + f(1, 0, 1)] - [f(0, 1, 0) + f(0, 1, 1)]
 \end{aligned}$$

**Corollary 1.** *For the fitness landscape model (3), the interaction terms  $\beta_{i,j}$  are related to marginal epistasis via  $\varepsilon_{i,j} = 2^{p-2} \beta_{i,j}$ .*

*Proof.* From Proposition 1 we have that conditional epistasis for a pair of genes  $(i, j)$  and a fixed genetic background of the remaining  $p - 2$  genes equals  $\beta_{i,j}$ . There are  $2^{p-2}$  such genetic backgrounds, and the conditional epistasis is the same for all of them.  $\square$

Thus, in the fitness landscape model (3), which contains all main effects and pairwise interactions, but no interactions of higher order, the interaction terms  $\beta_{i,j}$  alone determine conditional and marginal epistasis of the fitness landscape.

**1.2. Estimation of epistasis from RNAi perturbation screens.** In *in vitro* RNAi experiments cells are perturbed by reagents, such as siRNA, shRNA, and dsRNA (Singh, Narang, and Mahato 2011), each targeting a specific gene for knockdown. In recent years, it has been shown (Jackson et al. 2006) that siRNAs exhibit strong sequence-dependent off-target effects, such that, in addition to the intended target gene, hundreds of other genes are knocked down.

Thus, we can regard siRNA perturbation experiments as combinatorial knockdowns affecting multiple genes simultaneously. On the basis of the fitness landscape model (3), we propose a regression model for the estimation of epistasis from RNAi data. This inference is only feasible because of the unintended combinatorial nature of siRNA knockdowns.

**1.2.1. Perturbation type space.** For an RNAi-based perturbation screen, the perturbation type space  $\mathcal{P} = \{g_1, \dots, g_n\}$  is represented as the  $n \times p$  matrix  $\mathbf{X}$  that contains  $g_i$  in row  $i$ . Based on the nucleotide sequences of the reagents, perturbations can be predicted by models for micro RNA (miRNA) target prediction (Lewis et al. 2003). We use  $\mathbf{X}_1, \dots, \mathbf{X}_p$  to denote the  $p$  column vectors of  $\mathbf{X}$  for genes  $1, \dots, p$  and denote by  $\mathbf{X}_i \circ \mathbf{X}_j$  the column vector consisting of the element-wise products of the entries of  $\mathbf{X}_i$  and  $\mathbf{X}_j$ . As a measure of fitness, we use the vector  $\mathbf{Y} \in \mathbb{R}_+^n$ , denoting the number of cells present after siRNA knockdown.

**1.2.2. Regression model.** We aim to estimate the conditional epistasis  $\beta_{i,j}$  between the  $\binom{p}{2}$  pairs of genes  $(i, j) \in \{1, \dots, p\}^2$  from all combinatorial gene perturbations in the screen represented in the  $n \times p$  matrix  $\mathbf{X}$ , and the  $n \times 1$  vector of fitness phenotypes  $\mathbf{Y}$ . Based on (3) we regress phenotype  $\mathbf{Y}$  on perturbations  $\mathbf{X}$ ,

$$(9) \quad \mathbb{E}[\mathbf{Y} \mid \mathbf{X}] = \beta_0 + \sum_i \mathbf{X}_i \beta_i + \sum_{i < j} (\mathbf{X}_i \circ \mathbf{X}_j) \beta_{i,j}$$

The estimated  $\beta_{i,j}$  are interpreted as the expected change in the response variable  $\mathbf{Y}$  per unit change in the predictor variable  $(\mathbf{X}_i \circ \mathbf{X}_j)$  with all other predictors held fixed (Mosteller and Tukey 1977). From Corollary 1 it follows that estimates for marginal epistasis  $\varepsilon_{i,j}$  can be obtained by multiplication of  $\beta_{i,j}$  with the constant  $2^{p-2}$ .

**1.2.3. Inference.** We aim to infer the regression parameters  $\boldsymbol{\beta} = (\beta_0, \boldsymbol{\beta}_{\{i:i>0\}}, \boldsymbol{\beta}_{\{i,j:i<j\}})$ . Since it is infeasible to directly perform least squares linear regression on the matrix containing all  $\binom{p}{2}$  interactions, we use a two-stage process. First, we use either the group lasso regularisation package **glinternet** (Lim and Hastie 2015), or the **xyz** interaction search algorithm (Thanei, Meinshausen, and Shah 2018) to select non-zero interactions. This variable selection step is the main computational challenge.

When using **glinternet**, we infer parameters  $\boldsymbol{\beta} = (\beta_0, \boldsymbol{\beta}_{\{i:i>0\}}, \boldsymbol{\beta}_{\{i,j:i<j\}})$  by minimising the squared-error loss function

$$(10) \quad \mathcal{L}(\mathbf{Y}, \mathbf{X}; \boldsymbol{\beta}) = \frac{1}{2} \left\| \mathbf{Y} - \left( \beta_0 + \sum_i \mathbf{X}_i \beta_i + \sum_{i < j} (\mathbf{X}_i \circ \mathbf{X}_j) \beta_{i,j} \right) \right\|_2^2$$

under the *strong hierarchy* constraint

$$(11) \quad \beta_{i,j} \neq 0 \Rightarrow \beta_i \neq 0 \text{ and } \beta_j \neq 0.$$



This constraint allows conditional epistasis between gene  $i$  and  $j$ , i.e.,  $\beta_{i,j} \neq 0$ , only if both single-gene effects  $\beta_i$  and  $\beta_j$  are present and constrains the search space. Lim and Hastie (2015) show that this model can be formulated as a linear regression model with overlapped group lasso (OGL) penalty (Jacob, Obozinski, and Vert 2009), where, in contrast to the group lasso (Yuan and Lin 2006), each predictor can be present in multiple groups.

To perform the variable selection, **xyz** searches for pairs  $(i, j)$  that maximise  $Y^T X_i X_j$ . These are the interaction effects that account for the largest component of the response  $Y$ . While **xyz** can be used directly to find the largest interactions, we used **xyz\_regression** to estimate all interactions. **xyz\_regression** solves the following elastic-net problem (Thanei, Meinshausen, and Shah 2018)

$$(12) \quad \min_{(\beta_0, \beta) \in \mathbb{R}^{p+1}, \theta \in \mathbb{R}^{p(p+1)/2}} \left[ \frac{1}{2n} \sum_{i=1}^N (y_i - \beta_0 - x_i^T \beta - w_i^T \theta)^2 + \lambda (P_\alpha(\beta) + P_\alpha(\theta)) \right],$$

where

$$(13) \quad W \in \mathbb{R}^{n \times p(p+1)/2} = (X_1 \circ X_1, X_1 \circ X_2, \dots, X_1 \circ X_p, X_2 \circ X_2, \dots, X_p \circ X_p)$$

is the matrix of interactions, and

$$(14) \quad P_\alpha(\beta) = (1 - \alpha) \frac{1}{2} \|\beta\|_{\ell_2}^2 + \alpha \|\beta\|_{\ell_1}$$

is the elastic-net penalty.

The parameter  $\alpha$  decides the compromise between the ridge-regression penalty ( $\alpha = 0$ ) and the lasso penalty ( $\alpha = 1$ ). We left the default value of  $\alpha = 0.9$ . The solution is found iteratively, with only a particular set of beta values are allowed to be non-zero at each iteration. In every iteration, the beta values that violate the KarushKuhnTucker conditions are added to this set. Rather than being computed directly, these beta values are found using the **xyz** algorithm. We followed the recommendation in (Thanei, Meinshausen, and Shah 2018) and used  $L = \sqrt{p}$  projections to find the strong interactions. Our own tests in Appendix C also suggest that further projections do not improve performance.

Second, once the non-zero effects have been estimated using either **glinternet** or **xyz**, we construct a matrix  $X'$  with all elements of the set  $\{\mathbf{X}_i | \mathbf{X}_i \neq \mathbf{0}\} \cup \{\mathbf{X}_i \circ \mathbf{X}_j | \mathbf{X}_i \cdot \mathbf{X}_j \neq 0\}$  as columns, in an arbitrary order. We then fit  $Y \sim X' \beta$  using R's **lm** least squares linear regression to calculate the coefficient estimates and corresponding p-values. We adjust the p-value to control the false discovery rate with the method of Benjamini and Hochberg (1995), and refer to this adjusted value as the q-value. Given this two-step procedure, we do not expect these values to be the same as if they were calculated using the complete interaction matrix. We are nonetheless able to distinguish between more and less significant effects, with the caveat that the  $p < 0.05$  cut-off is completely arbitrary.



**1.3. Software.** The overlapped group lasso for strongly hierarchical interaction terms is implemented in the R-package `glinternet` 1.0.10 by Lim and Hastie (Lim and Hastie 2015) and available through the *Comprehensive R Archive Network* (CRAN) at <https://cran.r-project.org/web/packages/glinternet/>. The `xyz` algorithm is implemented in `xyz` 0.2 by Gian-Andrea Thanei (Thanei, Meinshausen, and Shah 2018) available at <https://cran.r-project.org/web/packages/xyz/>. The simulations are run using a version of this software that also contains a trivial bug fix, available at <https://github.com/bioDS/xyz-simulation>. For the data simulation, analysis and visualisation, we used the R-packages `Matrix` 1.2.6, `dplyr` 0.4.3, `tidyr` 0.4.1 and `ggplot2` 2.1.0. All simulations are performed using R 3.2.4.

**1.4. Simulation of RNAi data.** The data simulation followed a three-step procedure. First, we simulate the siRNA–gene perturbation matrix  $\mathbf{X}$  based on real siRNA libraries. Second, main effects  $\beta_i$  and conditional epistasis between pairs of genes  $\beta_{i,j}$  are sampled. Based on  $\mathbf{X}$  and  $\beta$ , we then sample fitness phenotypes  $\mathbf{Y}$  from our model (3) and add noise to match specific signal-to-noise ratios (Hastie, Tibshirani, and Friedman 2009)

$$(15) \quad \text{SNR} = \frac{\text{Var}(\mathbb{E}[\mathbf{Y} | \mathbf{X}])}{\text{Var}(\mathbf{Y} - \mathbb{E}[\mathbf{Y} | \mathbf{X}])}.$$

Details for each step including parameter ranges are as follows.

We simulate siRNA–gene perturbation matrices based on four commercially available genome-wide libraries for 20 822 human genes from Qiagen with an overall size of 90 000 siRNAs. First, we predict sequence dependent off-targets using TargetScan (Garcia et al. 2011) for each siRNA as described in (Schmich et al. 2015). We threshold all predictions to be 1 if larger than zero and 0 otherwise. Then, we sample  $n = 1\,000$  siRNAs from  $\{1, \dots, 90\,000\}$  and  $p = 100$  genes from  $\{1, \dots, 20\,822\}$  without replacement and construct the  $n \times p$  binary matrix  $\mathbf{X}$ . Hence, each row  $\mathbf{X}_i$  then contained the perturbation type  $g_i = (x_{i,1}, \dots, x_{i,p})$ .

We simulate  $q \in \{5, 20, 50, 100\}$  non-zero conditional epistasis terms  $\beta_{i,j}$  between genes  $i$  and  $j$  from all observed combinatorial knockdowns, i.e. if the simulated screen contained siRNAs that target both genes. This is a necessary condition for the identifiability of  $\beta_{i,j}$ , as otherwise, according to the model (9),  $\beta_{i,j}$  will be multiplied by a zero vector  $\mathbf{X}_i \circ \mathbf{X}_j = \mathbf{0}$ . The effect size of the  $\beta_{i,j}$  is sampled from  $\text{Norm}(0, 2)$ . In order to maintain a strong hierarchy, we subsequently simulate for each interaction  $\beta_{i,j}$  both main effects  $\beta_i$  and  $\beta_j$ . Further, we add  $r \in \{0, 20, 50, 100\}$  additional main effects. The effect sizes of the main effects are sampled from  $\text{Norm}(0, 1)$ , so that the variance in the response fitness phenotypes are split in a ratio of 1:2 between main effects and interactions.

In order to model synthetic lethal pairs, interactions with effect strength of  $-1000$  (on log scale) are added to the simulated data. Since lethal interactions may occur with little or no main effect present (Jerby-Arnon et al. 2014), we allow these pairs to violate the strong hierarchy and do not add main effects. This is done both for biological plausibility, and to evaluate the

performance of **xyz** and **glinternet** under less ideal circumstances. Since only **glinternet** assumes the strong hierarchy, this scenario might favour **xyz**.

Based on simulated perturbation matrices  $\mathbf{X}$ , simulated main effects  $\beta_i$  and interaction terms  $\beta_{i,j}$ , we sampled fitness values with  $\beta_0 = 0$  according to the fitness landscape model (3)

$$\mathbf{Y} \sim \text{Norm} \left( \sum_i \mathbf{X}_i \beta_i + \sum_{i < j} (\mathbf{X}_i \circ \mathbf{X}_j) \beta_{i,j}, \sigma^2 \mathbf{I} \right),$$

where we chose  $\sigma^2$  for fixed SNRs  $s \in \{2, 5, 10\}$ .

**1.5. Evaluation criteria.** We focus the evaluation on the estimated parameters of the model, specifically the conditional epistasis terms,  $\hat{\beta}_{\{i,j:i < j\}}$ , rather than the model's performance in predicting the fitness phenotypes  $\mathbf{Y}$ . Given the ground truth of true conditional epistasis between gene  $i$  and  $j$ ,  $\beta_{\{i,j:i < j\}}$ , we assess the performance of the model to identify epistasis, i.e., estimated non-zero coefficients  $\hat{\beta}_{i,j}$ , by computing the number of true positives (TPs), false positives (FPs) and false negatives (FN). Here, TPs represent the number of gene pairs  $(i, j)$  such that  $\beta_{i,j} \neq 0$  and  $\hat{\beta}_{i,j} \neq 0$ , FPs the number of gene pairs  $(i, j) : \beta_{i,j} = 0$  and  $\hat{\beta}_{i,j} \neq 0$  and FNs the number of gene pairs  $(i, j) : \beta_{i,j} \neq 0$  and  $\hat{\beta}_{i,j} = 0$ . The performance is then summarised using the following measures

$$\begin{aligned} \text{precision} &= \frac{\text{TP}}{\text{TP} + \text{FP}} \\ \text{recall} &= \frac{\text{TP}}{\text{TP} + \text{FN}} \\ \text{F1} &= 2 \frac{\text{precision} \times \text{recall}}{\text{precision} + \text{recall}} \end{aligned}$$

Furthermore, we investigate whether estimates  $\hat{\beta}_{i,j}$  have the same sign as the ground truth conditional epistasis and we quantify the deviation of the magnitude from the truth. Where applicable, we also evaluate the effect of selection of only those  $\beta_{i,j}$  which significantly deviate from zero on the model's performance.

## 2. RESULTS

First, we evaluate the proposed approach to estimating epistatic effects from off-target perturbations on simulated data. The approach depends on a model able to detect non-zero pairwise interactions (Figure 1). Here, we evaluate the approach using two such alternative models, **glinternet** and **xyz**.

We evaluate the ability of both **xyz** and **glinternet** to identify epistasis between pairs of genes from RNAi screens on simulated data with  $p = 100$  genes and  $n = 1\,000$  siRNAs. Only for **xyz**, we also test larger data sets, with  $p = 1\,000$  and  $n = 10\,000$ . We use off-target information from real siRNAs and investigate the performance for varying signal-to-noise ratios, number of true interactions, number of observations per double knockdown, and effect sizes for epistasis.

We perform a separate set of tests where we specifically assess the performance of the two methods to identify synthetic lethal interactions, the strongest negative interactions. For this purpose, we simulate a separate data set that contains additional synthetic lethal pairs of genes. In this test, we attempt to identify only lethal interactions using **xyz** and **glinternet**, given increasingly large numbers of genes.

**2.1. Identification of epistasis under varying conditions.** Both **xyz** and **glinternet** are tested on a series of small simulated data sets. For each combination of parameters  $q \in \{5, 20, 50, 100\}$ ,  $r \in \{0, 20, 50, 100\}$  and  $s \in \{2, 5, 10\}$ , controlling the number of true interactions, the number of additional main effects, and the SNRs of the fitness phenotypes, respectively, we sample 50 independent data sets. **xyz** is tested on a series of larger data sets, with parameters  $q \in \{50, 200, 500, 1000\}$ ,  $r \in \{0, 200, 500, 1000\}$  and  $s \in \{2, 5, 10\}$ . Only 10 independent data sets are sampled in these cases. Each data set consists of the perturbation matrix  $\mathbf{X}$ , phenotypes  $\mathbf{Y}$ , true conditional epistasis  $\beta_{i,j}$  and main effects  $\beta_i$ .

The distribution of the number of observations for pairwise knockdowns of gene  $i$  and  $j$  is shown in Appendix, Figure 10 for an exemplary perturbation matrix  $\mathbf{X}$ . While only a few genes have many observations, 87% of gene pairs are simultaneously perturbed by at least one siRNA. We also find that number of additional main effects has relatively little impact on detecting interactions (Appendix A), and this value is kept constant during our tests. We select only estimates  $\hat{\beta}_{i,j}$  with a magnitude significantly different from zero (q-value  $< 0.05$ ). This significantly improves precision, at a slight cost to recall, using both **glinternet** and **xyz** (Appendix, Figure 13).

**2.1.1. Number of double knockdowns per gene pair.** We fixed the number of additional main effects to 20 and investigated performance with respect to the number of double knockdowns per epistatic gene pair, i.e. siRNAs that target both genes (Figure 2). The results are largely similar for both **xyz** and **glinternet**. As expected, for increasing numbers of observations, we observe an increase in precision and recall with a steeper increase of precision compared to recall and decreased performance for higher number of true interactions. The number of true epistatic gene pairs primarily affects recall, which decreases for higher numbers of true non-zero  $\beta_{i,j}$ . For gene pairs with more than 80 observations of the double knockdown, **glinternet** shows strong performance with F1 values between 0.68 – 0.9 across all tested numbers of true interactions and an SNR larger than or equal to 5 (Figure 2a).

**xyz** shows significantly improved performance for gene pairs with more than 40 observations, with F1 values almost all above 0.25. Small numbers of true interactions are particularly accurate, with  $F1 > 0.5$  when there are also only 5 such effects (Figure 2b).

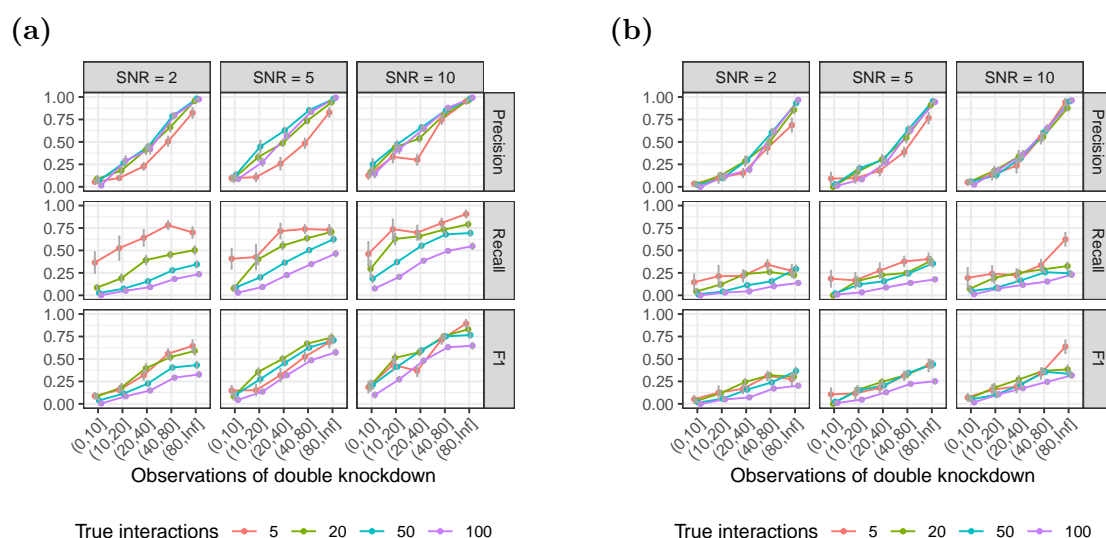

**Figure 2.** Identification of epistasis for increasing numbers of observations of the pairwise double knockdown. The number of additional main effects not overlapping with the set of interacting genes is fixed to 20. Results using (a) *glinternet* and (b) *xyz*.

The number of times each pair of genes is observed is shown in Figure 3. We see that in the large simulation, in which all parameters are multiplied by ten, the number of observations of each pair of genes is similarly scaled. As a result, the overall distribution is similar to the smaller simulation.

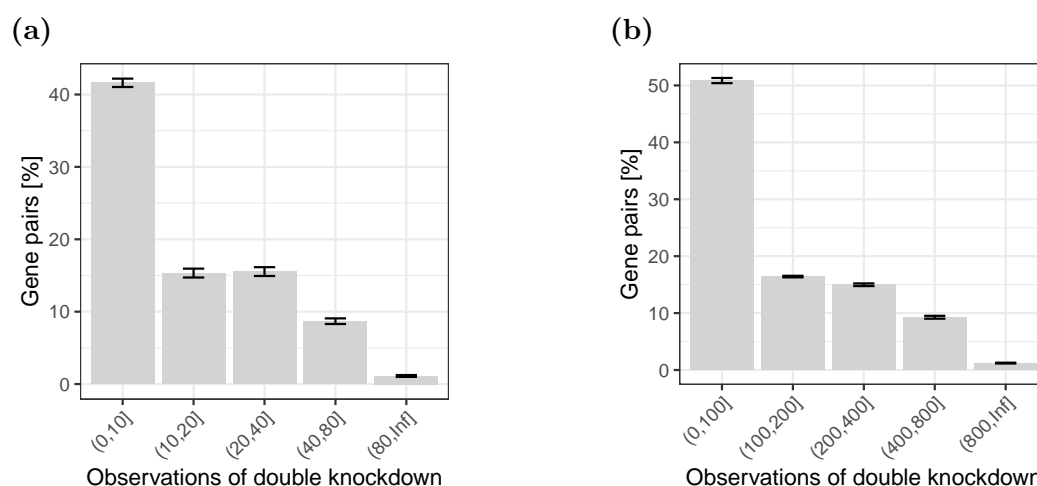

**Figure 3.** The distribution of the fraction of gene pairs stratified by ranges of observed double knockdowns. Gene pairs with zero observations are not shown. (a)  $p = 100$ ,  $n = 1000$ ; (b)  $p = 1000$ ,  $n = 10000$ .

**2.1.2. Epistatic effect size.** We observe that, for both **xyz** and **glinternet**, the performance of the model increases with the absolute value of the magnitude of the conditional epistasis between pairs of genes  $|\beta_{i,j}|$  (Figure 4). Both for negative and positive epistasis, recall and precision steeply increase with increasing effect size. For pairs of genes with  $|\beta_{i,j}| > 1$  and SNRs  $\geq 10$ , the model performs favourably with F1 values of 0.6 and higher in **glinternet**, and at least 0.25 in **xyz**. Overall performance also marginally improves for **glinternet** at SNR = 5, but no clear effect is seen for **xyz** or SNR = 10. With both **xyz** and **glinternet**, we observe exceptions to the general pattern of the overall V-shape for precision and recall, where strongly negative and positive epistasis and weak epistasis lead to high and low performance of the model, respectively. This effect can be explained by the fact that, after the significance test, an extremely small number of interactions are reported in these ranges (most often only one), with no false positives. The fact that the model's performance notably decreases for small effect sizes around zero explains why we observe a trend of decreasing performance for increasing numbers of true interactions, when we average over all effect sizes. This is because sampling true epistatic effect sizes from Norm(0, 2) for increasing numbers of true interactions increases the fraction of interactions with small effects around zero.

Notably, we can see in Figure 4b that even when the overall performance is poor, **xyz** is still able to find a small number of strong interactions relatively accurately. This is particularly promising, since synthetic lethal pairs would be such interactions.

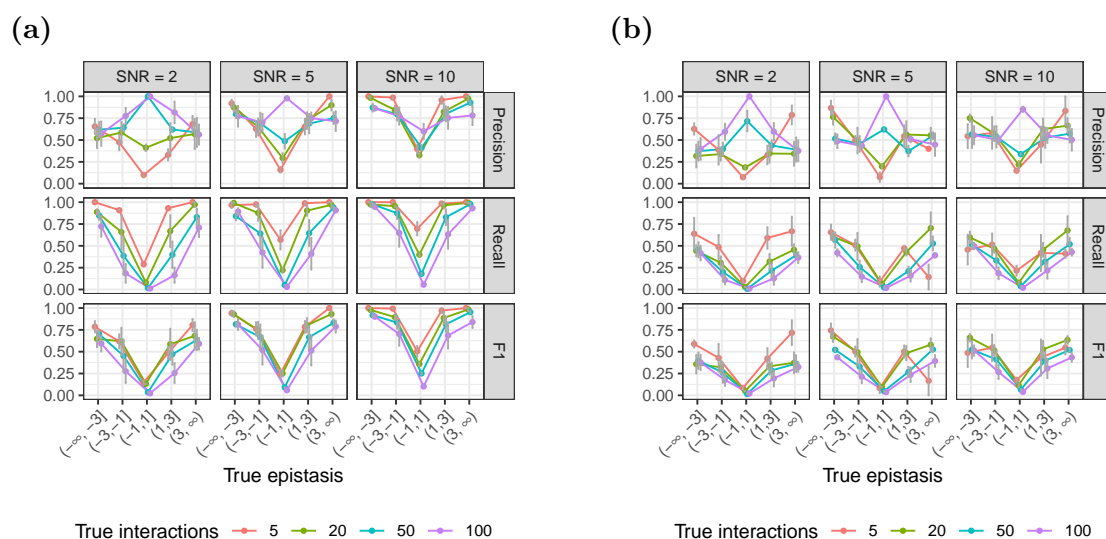

**Figure 4.** Identification of epistasis for varying effect size. Using (a) **glinternet** and (b) **xyz**.

**2.1.3. Direction.** We evaluate the ability of each method to distinguish between negative and positive epistasis among epistatic gene pairs identified as true positives (Figure 5). For both **glinternet** and **xyz**, the fraction of incorrect estimates of direction (positive vs. negative) is higher for decreasing effect size and increasing number of true interactions. For epistatic effects

with an absolute value  $> 1$ , we observe at most 3% incorrect predictions with **glinternet**, and 8% with **xyz**. We observe at most 9% and 15% incorrect predictions for smaller effect sizes for **glinternet** and **xyz** respectively. Furthermore, we observe that increasing SNRs leads to a subtle decrease of incorrectly predicted direction.

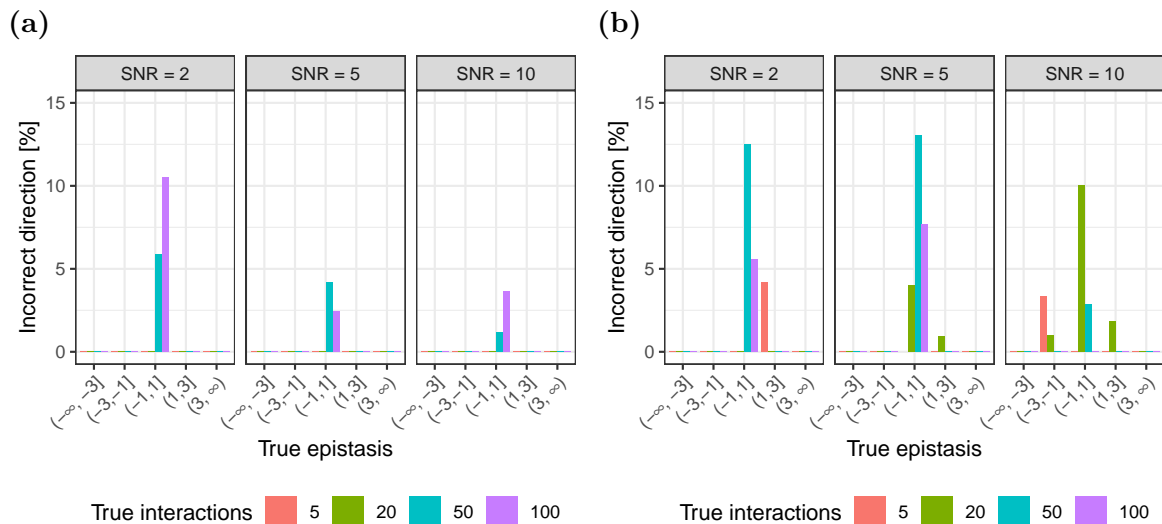

**Figure 5.** Concordance between the sign of true and estimated epistasis. The fraction of incorrectly identified signs between true and estimated epistasis for (a) **glinternet** and (b) **xyz**.

**2.1.4. Magnitude.** We evaluate the deviation of the magnitude of estimates for epistasis from the ground truth as a function of observed double knockdowns (Appendix, Figures 14 and 21). The deviation in magnitude is computed as  $\frac{|\beta_{i,j}| - |\hat{\beta}_{i,j}|}{|\beta_{i,j}|}$ , i.e. the percent relative change in deviation with respect to the true epistasis. We observe that across varying numbers of observations the model predicts the magnitude of epistasis between pairs of genes with high accuracy using both **xyz** and **glinternet**.

**2.2. Scalability.** Running **glinternet** until it has converged takes a prohibitively long time on larger data sets. While we are able to run our  $p = 100, n = 1,000$  simulations in slightly under two minutes, increasing to  $p = 1,000, n = 10,000$  takes over two days using ten cores. Since fitting with small lambda values takes the majority of the time, we can improve this by changing the minimum value of lambda that gets used. Adjusting this from  $\frac{\lambda_{\text{Max}}}{100}$  to  $\frac{\lambda_{\text{Max}}}{4}$ , and fitting only five lambdas in this range rather than fifty, **glinternet** still takes over an hour. This makes the repeated simulations from subsection 2.1 impractical at a larger scale with **glinternet**, although we do investigate some larger data sets in subsection 2.3.

Since **xyz** has significantly shorter run time than **glinternet**, here we more thoroughly investigate performance on larger data sets. Repeating the earlier simulations with every parameter





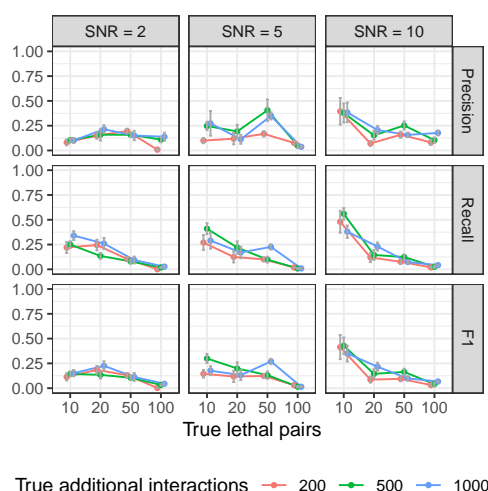

**Figure 7.** Precision, recall, and F1 performance for varying numbers of synthetic lethal pairs, with additional background interactions, using `xyz`. Neither side of the lethal interactions are used as main effects, and as far as lethal interactions are concerned, there is no hierarchy present.

**2.3.1. Synthetic lethality detection in larger matrices.** While we could not run a significant number of tests at this scale using `glineternet`, we could investigate how well its accuracy scales compared to `xyz`. To do this, we simulated sets of up to  $p = 4000$  genes, and measured the performance of both `xyz` and `glineternet`. In this case, both to avoid allocating more elements to a matrix than R allows, and to keep the run time of `glineternet` low, only  $n = 2 \times p$  siRNAs are simulated. The ratio of siRNAs, genes, main effects, interactions, and lethals, is fixed to:  $n = 200$  siRNAs,  $p = 100$  genes,  $b_i = 1$  main effect,  $b_{ij} = 20$  interaction effects,  $l = 5$  lethal interactions. Data sets are then generated with these values multiplied by 5, 10, 20, and 40. As in the previous simulation, components of lethal interactions are *not* added as main effects. The strong hierarchy assumption is not valid in this case.

Interactions are then found with both `xyz` and `glineternet`. Here we focus specifically on synthetic lethal detection, and only correct lethal pairs are considered true positives. Any other pair (including a true interaction that is not a lethal) is considered a false positive.

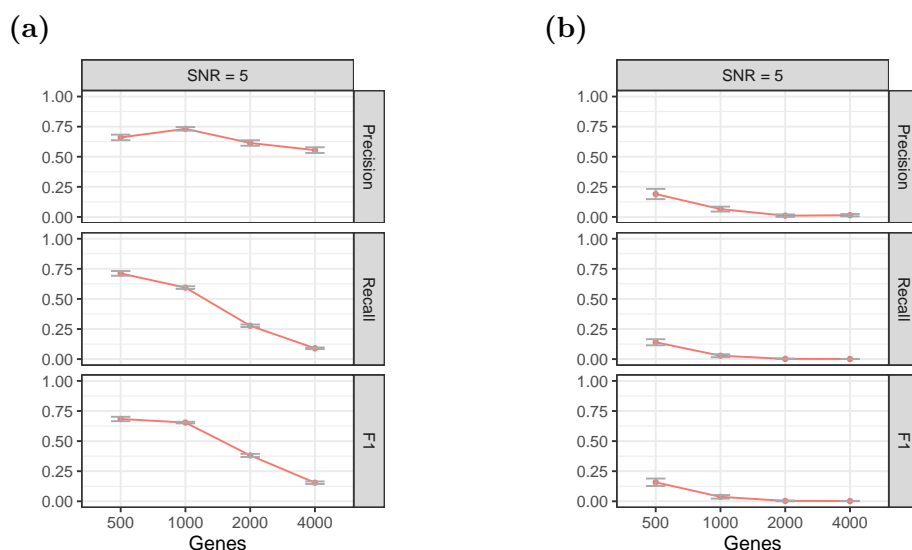

**Figure 8.** The performance of (a) *glinetnet* and (b) *xyz* on increasingly large data sets.

We can see in Figure 8a that precision with *glinetnet* remains fairly consistent as  $p$  increases. There is a roughly proportional reduction in recall as the number of lethal interactions increases. After a slight increase from 500 to 1000 genes, the actual number of significant interactions found remains fairly consistent. Beyond  $p = 2000$ , we found that *xyz* typically fails to find any of the lethal pairs (Figure 8b)

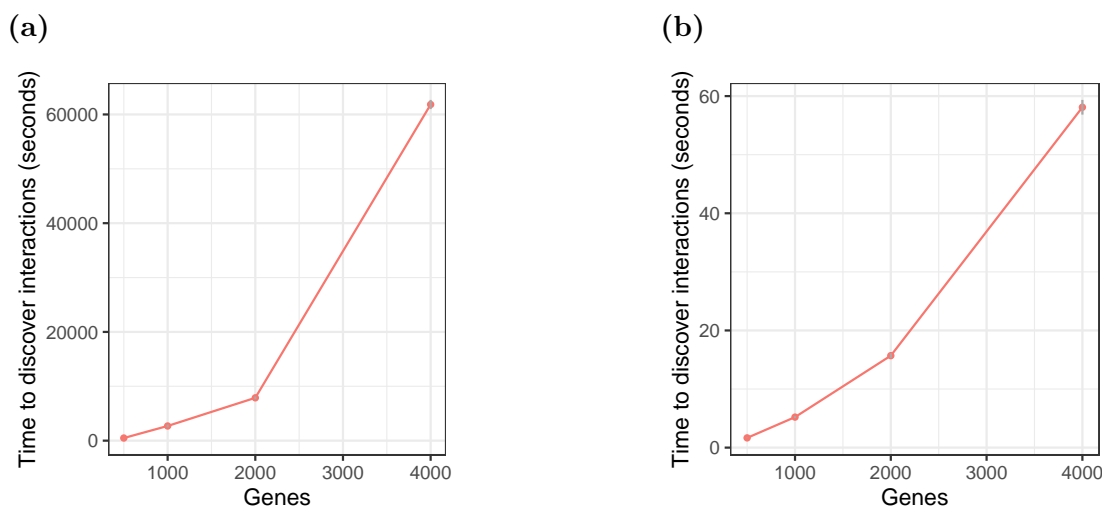

**Figure 9.** Run time in seconds to find interactions on increasing large data set. 9a: *glinetnet*. 9b: *xyz*. We compiled *glinetnet* with OpenMP and ran with `numCores = 10`.

Figure 9 shows that neither **xyz** nor **glinternet** quite demonstrate a linear run time, but the run time for **glinternet** increases sharply beyond  $p = 2000$ . It is possible that this is simply the result of less efficient cache use with larger data, but it is nonetheless worth noting.

**2.4. Violations to model assumptions.** For the regularised regression model (9) we assume strong hierarchy (11) between main effects  $\beta_i$  and interaction terms  $\beta_{i,j}$  in order to reduce the search space of all possible non-zero coefficients  $p + \binom{p}{2}$  during inference. We refer the reader to (Lim and Hastie 2015), where Lim and Hastie show how violations to this assumption affect the performance. For instance, the performance of the model is evaluated when the ground truth only obeys weak hierarchy, i.e. only one main effect present, no hierarchy, or anti-hierarchy. Additionally, approximately 2.5% of simulations failed to run using **xyz**, because the estimated interaction frequency of non interacting pairs was too low. These were fairly evenly distributed across all combinations of parameters (Figure 16), and are not believed to have substantially affected the results.

**2.5. Summary recommendation.** After simulating siRNA knockdown data sets of various sizes, and under various conditions, and attempting to reconstruct the interacting pairs using both **xyz** and **glinternet**, we arrive at the following recommendations. For data sets containing less than 4,000 genes (assuming between 2 and 10 experiments per gene), we recommend using **glinternet** to find interactions. Where **glinternet** would have a prohibitively long run time (data sets larger than those mentioned above), **xyz** continues to run quickly, and may still identify some useful results (Figure 7). Particularly when one expects a small number of significant interactions, increasing the number of projections beyond  $\sqrt{n}$  may improve performance here (see Appendix, Figure 15c).

**2.6. Effects in real data.** Following the recommendation we have arrived at in Section 2.5, we apply **glinternet** (followed by a linear regression analysis) to estimate epistatic effects from a real data set. We use the perturbation data from (Rämö et al. 2014), containing siRNA screens targeting kinases of five bacterial pathogens and two viruses, and apply the routine as described in Section 1.2 to identify pairwise kinase-kinase interactions. Specifically, we restrict the data to siRNAs that target kinases from the Qiagen Human Kinase siRNA Set V4.1, and the off-target effects within this set, resulting in an input matrix containing 11 214 perturbations  $\times$  667 genes. Using  $f = \log_2(\frac{\text{Cells after}}{\text{Cells before}})$  as a fitness measure, we found 1662 effects, 116 of which had a p-value less than 0.05. Since we have assumed that perturbations are binary in our simulations, we continue to do so here. As a result, all non-zero predicted off-target effects are given a value of 1. The ten most significant predicted effects are shown in Table 1.

<sup>1</sup> Interestingly, the most significantly associated pair of genes, CDK5R1 and RPS6KA2, are both related to a common pathway. Specifically, CDK5R1 activates CDK5, which, along with RPS6KA2, is part of the IL-6 signalling pathway (Kandasamy et al. 2010). Searching both the

<sup>1</sup>The full set of results, significant or otherwise, can be found at [https://github.com/bioDS/xyz-simulation/blob/master/real\\_data\\_results\\_sorted.csv](https://github.com/bioDS/xyz-simulation/blob/master/real_data_results_sorted.csv)

ConsensusPathDB database (Kamburov et al. 2009), and STRING database (Szklarczyk et al. 2017) for relations between the found pairs, we find that a number of the interactions suggested here could be the result of existing known interactions. We each of the identified pairs of genes, we searched for common neighbours (a third gene with which both interact), shared pathways, and whether the produced proteins are found in the same protein complexes, and found the following known relationships:

CDK5R1 and RPS6KA2 share a common neighbour, and are present in four of the same enriched pathway-based sets. TTK and RPS6KA2 share nine common neighbours. RIPK4 and GRK3 share one neighbour, and homologs were found interacting in other species. TNIK and PANK4 share one neighbour, as do MAPK4 and TRPM7, MAP2K6 and UCK1, and HIPK1 and NUA2. As we could not locate the other identified pairs in the database, we hypothesise that they might constitute novel interactions.

| Gene $i$ | Gene $j$ | Type        | Estimated Effect | P-value |
|----------|----------|-------------|------------------|---------|
| CDK5R1   | RPS6KA2  | interaction | 12.52            | 0.0047  |
| RIPK4    | GRK3     | interaction | -3.24            | 0.0056  |
| PHKB     | GUK1     | interaction | -7.47            | 0.0061  |
| MAP2K6   | UCK1     | interaction | -40.89           | 0.0094  |
| TNIK     | PANK4    | interaction | -37.41           | 0.0115  |
| RPS6KB2  | TTK      | interaction | 172.04           | 0.0118  |
| MAPK4    | TRPM7    | interaction | 9.49             | 0.0120  |
| HIPK1    | NUAK2    | interaction | -13.17           | 0.0126  |
| CDK19    | NA       | main        | 3.80             | 0.0136  |
| C17orf75 | MAPK8IP3 | interaction | 21.74            | 0.0136  |

**Table 1.** Ten most significant predicted effects of siRNA perturbation screens, targeting all human kinases.

For comparison we also fit a linear model including all genes, but no interactions. Comparing the  $R^2$  values for each, we find that individual gene effects explain  $\approx 15\%$  of the variance ( $R^2 = 0.150$ ) Including the interactions chosen by **glinternet**, and removing the main effects it sets to zero, we have  $R^2 = 0.392$ , more than doubling the fraction of explained variance. This highlights the importance of accounting for interactions in large-scale genotype-phenotype analyses, and relevance of bioinformatic tools with this capability.

### 3. DISCUSSION

To the best of our knowledge, the presented model is the first approach that leverages the combinatorial nature of RNAi knockdown data resulting from sequence-dependent off-target

effects for the large-scale prediction of epistasis between pairs of genes. To do this, we take the second-order approximation of the fitness landscape, including only individual and pairwise effects, and attempt to infer the parameters of this model. Since **glinternet** is able to find pairwise interactions among  $p = 1,000$  genes, we speculate that searching for three-way interactions is feasible among  $\sqrt[3]{1,000^2} = 100$  genes. We are not aware of any software currently able to do this, however.

For the majority of our tests, we simulate the presence of a strong hierarchy. This constraint would imply that for the inference of non-zero epistatic effects between gene  $i$  and  $j$ ,  $\beta_{i,j}$ , we penalise cases where the main effects for both single genes,  $\beta_i$  and  $\beta_j$ , are zero. This constraint significantly decreases the complexity of the search space of interactions. However, in biology there are many examples of epistasis where the marginal effects of individual genes are very small, for instance if both genes redundantly execute the same function within the cell (Puchta et al. 2016). Costanzo et al. (2010) found in their study of experimental double knockouts in yeast that single mutants with decreasing fitness phenotypes tended to exhibit an increasing number of genetic interactions. This observation is reassuring for **glinternet**, which can pick up the interaction as long as the true single-mutant effects are not exactly zero. Moreover, Lim and Hastie showed in a simulation study that the model is in fact flexible enough to also identify pairwise interactions violating the strong hierarchy constraint (Lim and Hastie 2015). For the detection of strong interactions, specifically synthetic lethal pairs, we have also demonstrated that the strong hierarchy constraint is not required.

In a simulation study, we sampled perturbations for  $n = 1000$  siRNAs and  $p = 100$  genes, and  $n = 10000$  siRNAs with  $p = 1000$  genes. As a consequence of high-throughput genome-wide screening platforms, the setting of  $n = 10 \times p$ , i.e. ten perturbations with different siRNAs per gene, is realistic even for higher order organisms with tens of thousands of genes (Rämö et al. 2014; Schmich et al. 2015). Sampling the perturbations directly from commercially available RNAi libraries allows us to translate results from the simulation study to applications on real data. We observe that increasing SNRs, as expected, results in an overall increase of the number of successfully identified gene pairs with true epistasis.

Nevertheless, we found that even for a moderate SNR of only 2, the model identifies interactions with acceptable performance using **glinternet** ( $F1 > 0.5$  for 50 true interactions), when we observed each double knockdown over 40 times (Figure 2a) or the effect size of epistasis is larger than 1, i.e.  $|\beta_{i,j}| > 1$  (Figure 4a). For an SNR of 5 and across all tested numbers of additional gene pairs and epistatic effect sizes, the performance of the model is approximately constant at around  $F1 = 0.5$ , independent of the number of true epistatic gene pairs (Figure 11b).

Performance in our simulations also suggests that **xyz** is unable to accurately identify interactions in large data sets. Although **xyz** has a consistently short run time, and appears capable

of running on genome-scale data, we see a significant drop in all other performance measures beyond  $p = 1000$  genes.

The results when using **glinternet**, however, suggest that the general approach is able to accurately identify pairwise epistasis from large-scale RNAi data sets, given that the SNR of measured fitness phenotypes is larger than 2 and the effect size of epistasis is larger than 1. It is challenging to compare the performance of these models to approaches that estimate genetic interactions from other data, such as for instance from double knockout experiments (Costanzo et al. 2010), due to different scales of the epistatic effect size, however, the high precision of **glinternet** seems quite competitive. Moreover, our simulations demonstrated that if true epistatic effects between pairs of genes are identified, the model identifies both the direction of epistasis (positive and negative) as well as the magnitude of the epistatic effect with high accuracy (Figures 5 and 14).

In detecting lethal interactions specifically, the high precision of **glinternet** after testing for significant deviations is particularly promising. Using this as a method to detect likely synthetic lethal interactions from RNAi data sets, we could propose candidates for further investigation as anticancer drug targets (Chan and Giaccia 2011)(Ashworth, Lord, and Reis-Filho 2011). While the run time may prevent **glinternet** from being used as such a method in genome-scale applications, we can recommend it for use with smaller data sets, or where the number of potential interactions can be significantly reduced prior to running **glinternet**. As the precision does not appear to suffer with larger input, only the run time, we believe combining linear regression with a perturbation matrix is a promising method for further investigation, and work to improve the performance sufficiently for use in genome-scale applications is ongoing.

Finally, it is worth noting that this approach is not limited to siRNA perturbation matrices, or to synthetic lethal detection. Any method of suppressing gene expression, combined with an affected proxy for fitness, could be used to find likely candidates for epistasis.

# ACKNOWLEDGEMENTS

This work has partially been funded by SystemsX.ch, the Swiss Initiative in Systems Biology, under IPhD grant 2009/025 and RTD grants 51RT-0\_126008 (InfectX) and 51RTP0\_151029 (TargetInfectX), evaluated by the Swiss National Science Foundation.

We acknowledge support from the Royal Society Te Apārangi through a Rutherford Discovery Fellowship (RDF-UOO1702) awarded to AG. This work was partially supported by Ministry of Business, Innovation, and Employment of New Zealand through an Endeavour Smart Ideas grant (UOOX1912) and a Data Science Programmes grant (UOAX1932).

# REFERENCES

Ashworth, A, CJ Lord, and JS Reis-Filho (2011). “Genetic Interactions in Cancer Progression and Treatment”. *Cell*.



- Beerenwinkel, N, L Pachter, and B Sturmfels (2007). “Epistasis and Shapes of Fitness Landscapes”. *Statistica Sinica*.
- Benjamini, Y and Y Hochberg (1995). “Controlling the False Discovery Rate: A Practical and Powerful Approach to Multiple Testing”. en. *Journal of the Royal Statistical Society: Series B (Methodological)* 57.1, pp. 289–300. ISSN: 2517-6161. DOI: 10.1111/j.2517-6161.1995.tb02031.x.
- Chan, DA and AJ Giaccia (2011). “Harnessing Synthetic Lethal Interactions in Anticancer Drug Discovery.” *Nature Reviews Drug Discovery*.
- Cordell, HJ (2002). “Epistasis: What It Means, What It Doesn’t Mean, and Statistical Methods to Detect It in Humans.” *Human molecular genetics*.
- Costanzo, M et al. (2010). “The Genetic Landscape of a Cell.” *Science*.
- de Visser, JAGM, TF Cooper, and SF Elena (Dec. 2011). “The Causes of Epistasis”. *Proceedings of the Royal Society B: Biological Sciences* 278.1725, pp. 3617–3624. DOI: 10.1098/rspb.2011.1537.
- DepMap, B (June 2020). *DepMap 20Q2 Public*. DOI: 10.6084/m9.figshare.12280541.v4.
- Force, T and KL Kolaja (2011). “Cardiotoxicity of Kinase Inhibitors: The Prediction and Translation of Preclinical Models to Clinical Outcomes.” *Nature Reviews Drug Discovery*.
- Garcia, DM et al. (2011). “Weak Seed-Pairing Stability and High Target-Site Abundance Decrease the Proficiency of Lsy-6 and Other microRNAs”. *Nature Structural & Molecular Biology*.
- Hanahan, D and RA Weinberg (2011). “Hallmarks of Cancer: The next Generation.” *Cell*.
- Hastie, T, R Tibshirani, and J Friedman (2009). *The Elements of Statistical Learning*. Springer New York.
- Holohan, C, S Van Schaeybroeck, DB Longley, and PG Johnston (2013). “Cancer Drug Resistance: An Evolving Paradigm.” *Nature Reviews. Cancer*.
- Jackson, AL et al. (July 2006). “Widespread siRNA ”off-Target” Transcript Silencing Mediated by Seed Region Sequence Complementarity”. *RNA* 12.7, pp. 1179–1187. ISSN: 1355-8382, 1469-9001. DOI: 10.1261/rna.25706.
- Jacob, L, G Obozinski, and JP Vert (2009). “Group Lasso with Overlap and Graph Lasso”. *ICML ’09*.
- Jerby-Arnon, L et al. (Aug. 2014). “Predicting Cancer-Specific Vulnerability via Data-Driven Detection of Synthetic Lethality”. English. *Cell* 158.5, pp. 1199–1209.
- Kaelin, WG (2005). “The Concept of Synthetic Lethality in the Context of Anticancer Therapy.” *Nature Reviews. Cancer*.
- Kamburov, A, C Wierling, H Lehrach, and R Herwig (Jan. 2009). “ConsensusPathDB-a Database for Integrating Human Functional Interaction Networks”. *Nucleic Acids Research* 37, pp. D623–D628. ISSN: 0305-1048. DOI: 10.1093/nar/gkn698.
- Kandasamy, K et al. (Jan. 2010). “NetPath: A Public Resource of Curated Signal Transduction Pathways”. *Genome Biology* 11.1, R3. ISSN: 1474-760X. DOI: 10.1186/gb-2010-11-1-r3.



- Laufer, C, B Fischer, M Billmann, W Huber, and M Boutros (2013). “Mapping Genetic Interactions in Human Cancer Cells with RNAi and Multiparametric Phenotyping.” *Nat Meth.*
- Lewis, BP, Ih Shih, MW Jones-Rhoades, DP Bartel, and CB Burge (Dec. 2003). “Prediction of Mammalian MicroRNA Targets”. *Cell* 115.7, pp. 787–798. ISSN: 0092-8674. DOI: 10.1016/S0092-8674(03)01018-3.
- Lim, M and T Hastie (2015). “Learning Interactions via Hierarchical Group-Lasso Regularization”. English. *Journal of Computational and Graphical Statistics* 24.3, pp. 627–654.
- McDonald, ER et al. (July 2017). “Project DRIVE: A Compendium of Cancer Dependencies and Synthetic Lethal Relationships Uncovered by Large-Scale, Deep RNAi Screening”. *Cell* 170.3, 577–592.e10. ISSN: 00928674. DOI: 10.1016/j.cell.2017.07.005.
- Mosteller, F and JW Tukey (1977). “Data Analysis and Regression: A Second Course in Statistics.” *Addison-Wesley Series in Behavioral Science: Quantitative Methods*.
- O’Neil, NJ, ML Bailey, and P Hieter (Oct. 2017). “Synthetic Lethality and Cancer”. *Nature Reviews Genetics* 18.1010, pp. 613–623. ISSN: 1471-0064. DOI: 10.1038/nrg.2017.47.
- Orr, HA (Aug. 2009). “Fitness and Its Role in Evolutionary Genetics”. English. *Nature Reviews. Genetics* 10.8, pp. 531–539.
- Puchta, O et al. (May 2016). “Network of Epistatic Interactions within a Yeast snoRNA”. English. *Science* 352.6287, pp. 840–844.
- Rämö, P et al. (Dec. 2014). “Simultaneous Analysis of Large-Scale RNAi Screens for Pathogen Entry”. *BMC Genomics* 15.1, p. 1162. ISSN: 1471-2164. DOI: 10.1186/1471-2164-15-1162.
- Schmich, F et al. (2015). “gespeR: A Statistical Model for Deconvoluting off-Target-Confounded RNA Interference Screens.” *Genome Biology*.
- Schultz, N et al. (2011). “Off-Target Effects Dominate a Large-Scale RNAi Screen for Modulators of the TGF- $\beta$  Pathway and Reveal microRNA Regulation of TGFBR2.” *Silence*.
- Singh, S, AS Narang, and RI Mahato (Dec. 2011). “Subcellular Fate and Off-Target Effects of siRNA, shRNA, and miRNA”. *Pharmaceutical Research* 28.12, pp. 2996–3015. ISSN: 1573-904X. DOI: 10.1007/s11095-011-0608-1.
- Srivatsa, S et al. (July 2018). “Improved Pathway Reconstruction from RNA Interference Screens by Exploiting Off-Target Effects”. *Bioinformatics* 34.13, pp. i519–i527. ISSN: 1367-4803. DOI: 10.1093/bioinformatics/bty240.
- Steckel, M et al. (2012). “Determination of Synthetic Lethal Interactions in KRAS Oncogene-Dependent Cancer Cells Reveals Novel Therapeutic Targeting Strategies.” *Cell Research*.
- Szklarczyk, D et al. (Jan. 2017). “The STRING Database in 2017: Quality-Controlled Protein-Protein Association Networks, Made Broadly Accessible”. en. *Nucleic Acids Research* 45.D1, pp. D362–D368. ISSN: 0305-1048. DOI: 10.1093/nar/gkw937.
- Tang, W et al. (2008). “A Genome-Wide RNAi Screen for Wnt/Beta-Catenin Pathway Components Identifies Unexpected Roles for TCF Transcription Factors in Cancer.” *Proceedings of The National Academy Of Sciences Of The United States Of America*.

- Thanei, GA, N Meinshausen, and RD Shah (Jan. 2018). “The Xyz Algorithm for Fast Interaction Search in High-Dimensional Data”. *Journal of Machine Learning Research* 19.1, pp. 1343–1384.
- Tiuryn, J and E Szczurek (July 2019). “Learning Signaling Networks from Combinatorial Perturbations by Exploiting siRNA Off-Target Effects”. en. *Bioinformatics* 35.14, pp. i605–i614. ISSN: 1367-4803. DOI: 10.1093/bioinformatics/btz334.
- Wright, S (1932). “The Roles of Mutation, Inbreeding, Crossbreeding, and Selection in Evolution”. *Proc 6th Int. Cong. Genet.* 1, pp. 356–366.
- Yuan, M and Y Lin (2006). “Model Selection and Estimation in Regression with Grouped Variables”. *J R Stat Soc Series B Stat Methodol.*

# APPENDIX A. NUMBER OF EPISTATIC GENE PAIRS

For  $n = 10 \times p = 1000$  siRNAs, 87% of the  $\binom{p}{2} = 4950$  gene pairs are simultaneously perturbed by at least one siRNA.

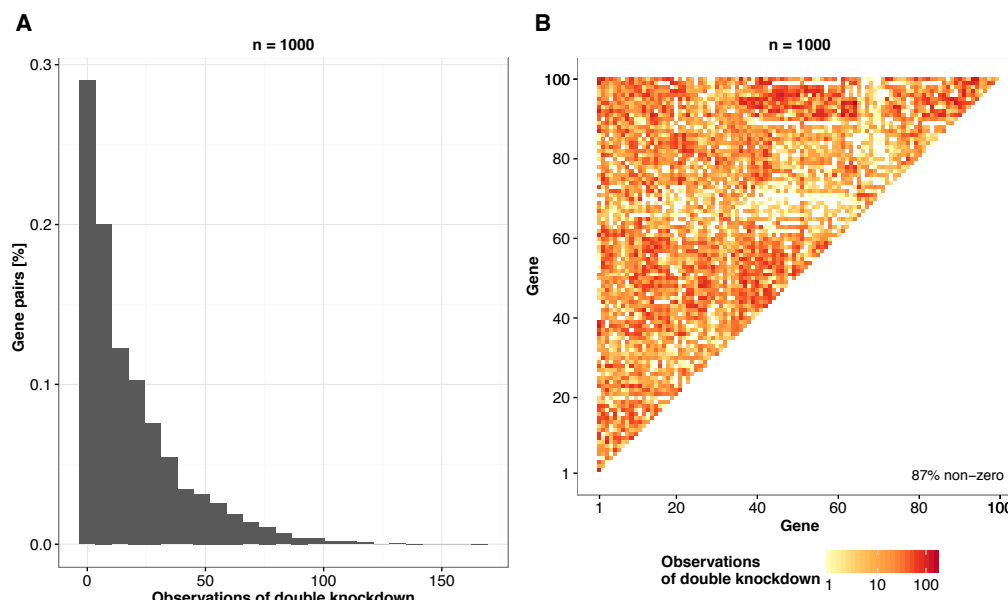

**Figure 10.** Simulation of perturbation matrices for  $n = 1000$  siRNAs and  $p = 100$  genes based on four commercial genome-wide siRNA libraries from Qiagen. (A) The number of times each pair of genes is simultaneously perturbed in the simulated matrix. (B) Heat map of the number of simultaneous perturbations for each gene pair. Darker colour indicates higher numbers of observations. 87% of the  $\binom{p}{2}$  pairs are simultaneously perturbed at least once.

An increase in the number of pairs of genes  $(i, j) : \beta_{i,j} > 0$ , i.e. pairs of genes with true conditional epistasis greater than zero, generally leads to an increase in precision and decrease in recall which results in a subtle increase in F1 when searching with **glineternet** (Figure 11a). The only exception being when there are no additional main effects, in which case interactions are more reliably found from among a small set (between 5 and 20 depending on the SNR) than a large one (50 or more). When we select estimates  $\hat{\beta}_{i,j}$  with a magnitude significantly different from zero (Figure 11b), we observe a more than 3-fold increase of precision but steeper decrease of recall for increasing numbers of pairs of genes with true conditional epistasis. This results in approximately 2-fold increase of the F1 measure, which in addition shows a weaker dependency on the number of gene pairs with true conditional epistasis. With an increasing number of additional main effects, the performance generally decreases. The effect is more subtle for high numbers of true epistatic gene pairs, both with and without selecting  $\hat{\beta}_{i,j}$  significantly different from zero. As expected, higher SNRs leads to better performance, where this effect is stronger when we perform the significance test. The trade-off between precision and recall resulting from

the significance test is shown in Figure 13a. The increase in precision and decrease of recall is stronger for higher number of true epistatic gene pairs. For small numbers of true epistatic gene pairs (5, 20) we observe a dependency of the strength of increase of precision and decrease of recall to the number of additional main effects. Overall, the ratio of increase in precision and decrease of recall is approximately 3, suggesting that the test in general led to an increase in performance. Figures without this test may be found in Appendix D.

It should be noted that the expected precision of random guessing of interactions is  $\frac{q}{p(p-1)}$ . This is at most  $\approx 1\%$ , when  $q = 100, p = 100$ , as in our simulations.

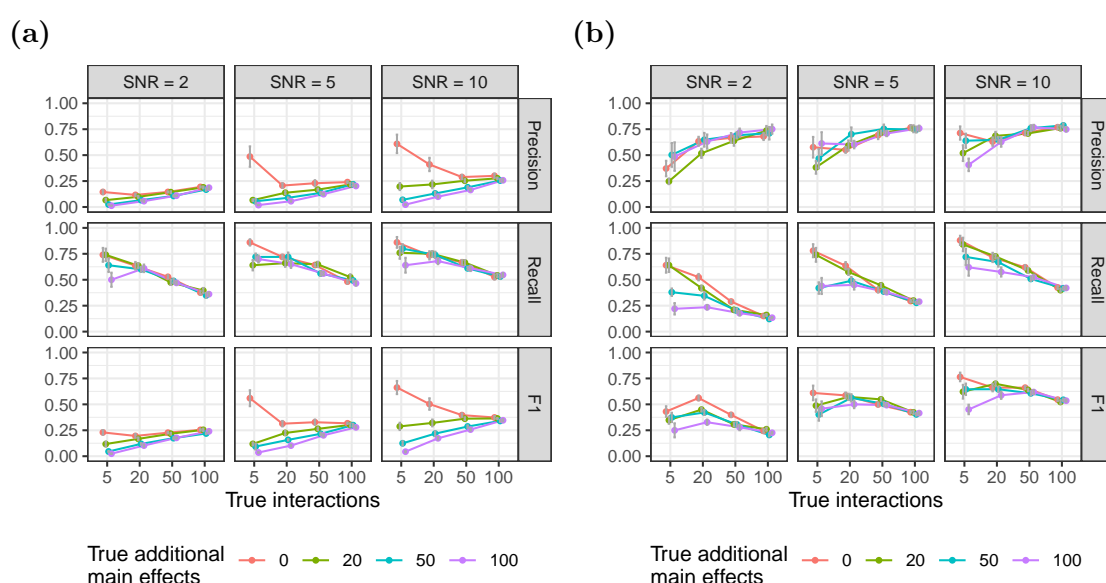

**Figure 11.** Identification of epistasis for increasing numbers of true interactions using *glinetnet*. Panel rows show precision, recall, and the F1 measure and panel columns depict results for signal-to-noise ratios (SNR) 2, 5, and 10. Colour indicates the number of additional main effects not overlapping with the set of interacting genes. (a) Results for all conditional epistasis  $\beta_{i,j} > 0$ ; (b) Results for the subset of conditional epistasis  $\beta_{i,j}$  that significantly deviate from zero (q-value  $< 0.05$ ).

Using the same number of genes and main effects and searching with *xyz*, we see similar precision, albeit with significantly lower recall (Figure 12). As with *glinetnet*, performance improved with higher SNRs. Selecting estimates that significantly deviate from zero (q-value  $< 0.05$ ) results in as much as a 2-fold improvement in precision in the best case, however improvements are generally smaller with *xyz* than with *glinetnet*. In this case, the effect on recall is minimal, the trade-off is shown in Figure 13b.

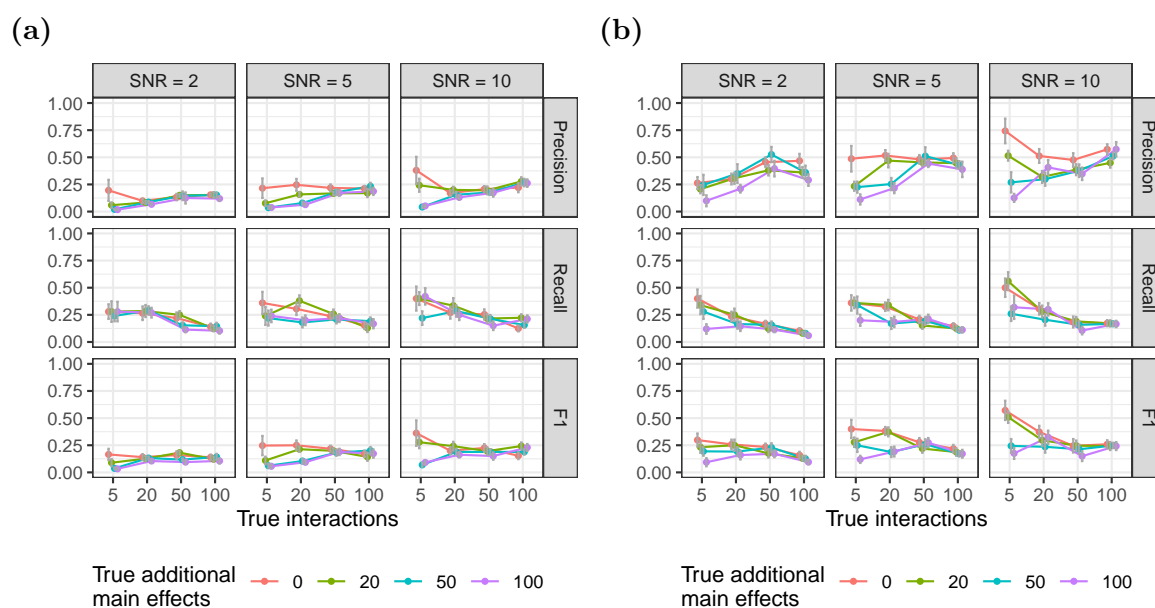

**Figure 12.** Results for xyz as in Figure 11. Note that this format is reused in all such figures. (a) Without significance test. (b) With significance test.

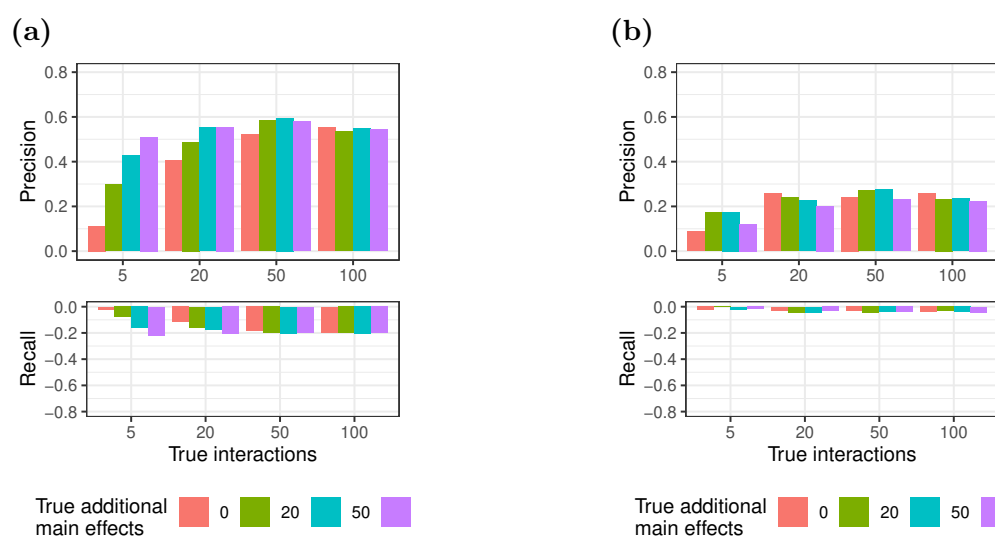

**Figure 13.** Trade-off between precision and recall for selecting the subset of interactions significantly deviating from zero versus all interactions. Top and bottom panels depict gain of precision and loss of recall, respectively. (a) glinternet; (b) xyz.

## APPENDIX B. MAGNITUDE

Comparing the estimated magnitude of epistasis to the ground truth, we find the **glinternet** results typically deviate less than 5%, and are only larger with a large number of true interactions, and a low signal to noise ratio. Using **xyz** we can see some significant variation in accuracy. The deviation is, however, typically below 10%.

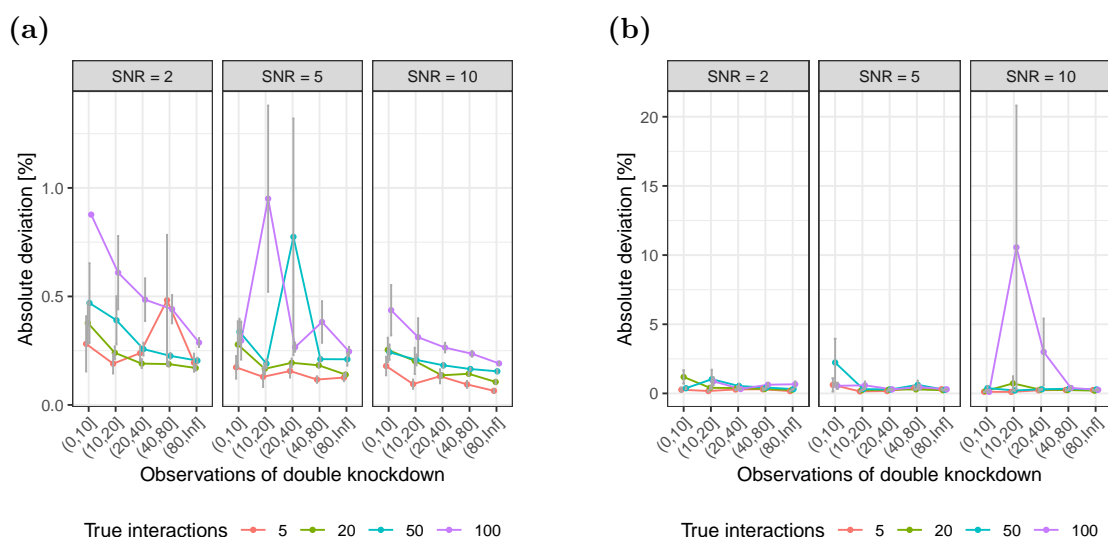

**Figure 14.** Concordance between the magnitude of true and estimated epistasis. The fraction of incorrectly identified signs between true and estimated epistasis for (a) **glinternet** and (b) **xyz**. Results are for the subset of interactions that significantly deviate from zero ( $q\text{-value} < 0.05$ ).

## APPENDIX C. NUMBER OF **xyz** PROJECTIONS

To ensure the correct **xyz** parameters are chosen, we compare precision, recall, and F1 for varying numbers of projections. Fixing the signal to noise ratio to  $SNR = 5$ , and using the same parameters as the main  $p = 1000$  simulations above, we run **xyz** with  $L = 10, 100$ , and 1000.

While there is a clear advantage to running at least  $L = \sqrt{n} = 100$  projections, there are no significant gains in overall performance, as indicated by  $F1$ , beyond that. In fact, we can see in Figure 15c that increasing the number of projections beyond that merely reduces the number of interactions returned, without improving accuracy.

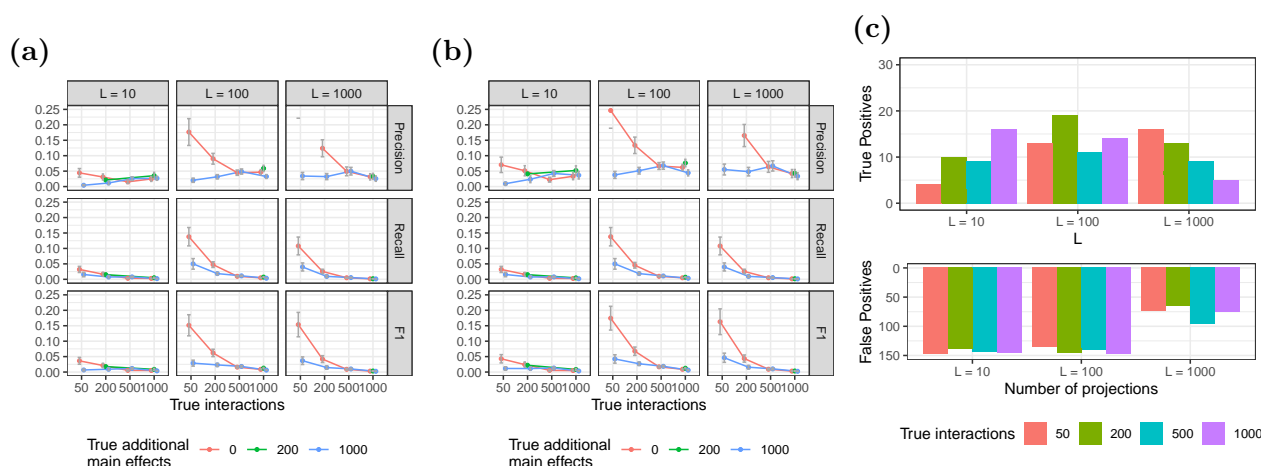

**Figure 15.** Precision, recall, and F1 as a result of increasing the number of projections. We use  $p = 1000$  genes with a signal to noise ratio of five. 15a: Results considering all identified conditional epistasis. 15b: Results considering only the subset of conditional epistasis that significantly deviate from zero. 15c: Number of interactions reported, note that the scale above differs from the one below for readability.

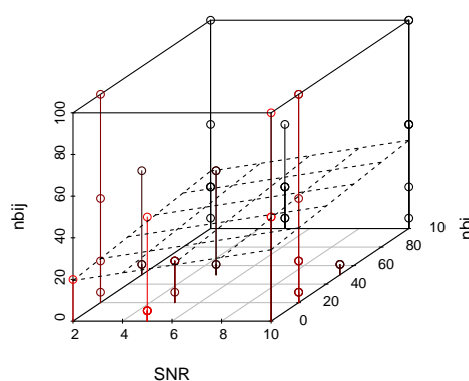

**Figure 16.** Distribution of xyz failures.

#### APPENDIX D. RESULTS WITHOUT SIGNIFICANCE TEST

The results used above are using R's `lm` linear regression, including only those with significant q-values ( $q < 0.05$ ). Here we perform the same tests with all found effects included, significant or otherwise, or comparison.



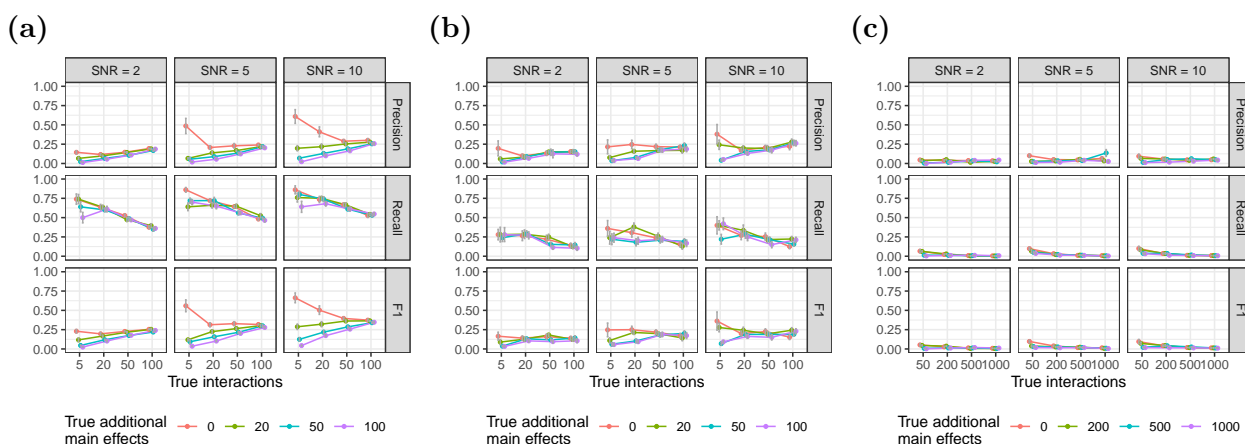

**Figure 17.** Precision, recall, and F1 performance measures for xyz. 17a: Results for all identified epistasis on  $p = 100$ ,  $n = 100$  simulation using *glinetnet*. 17b: Results for all identified epistasis on  $p = 100$ ,  $n = 100$  simulation using *xyz*. 17c: Results for all identified epistasis on  $p = 1000$ ,  $n = 10000$  simulation using *xyz*.

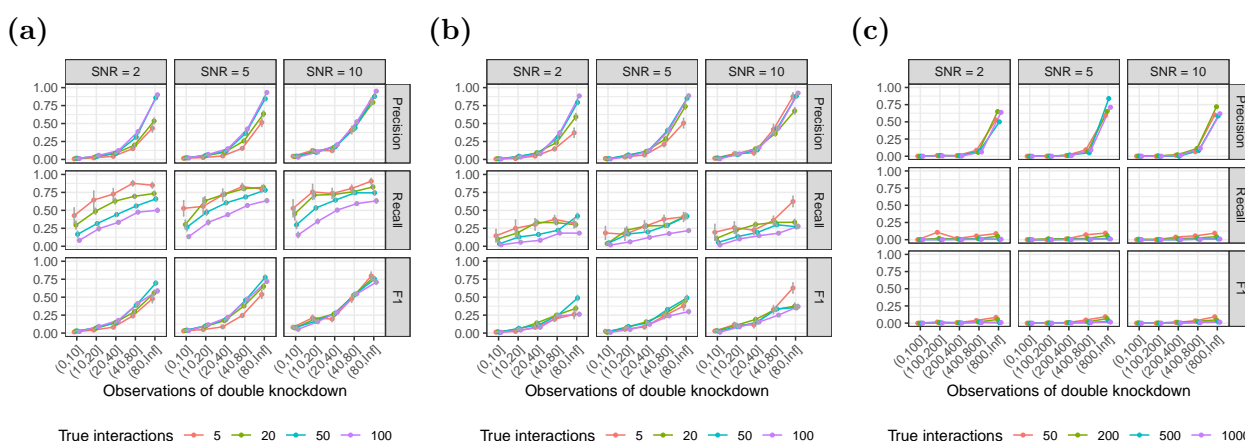

**Figure 18.** Identification of epistasis for increasing numbers of observations of the pairwise double knockdown. Results are for all identified conditional epistasis  $\beta_{i,j} > 0$ . (a) Results using *glinetnet*. (b) Results using *xyz* on small ( $p = 100$ ,  $n = 1000$ ) simulations. (c) Results using *xyz* on large ( $p = 1000$ ,  $n = 10000$ ) simulations.

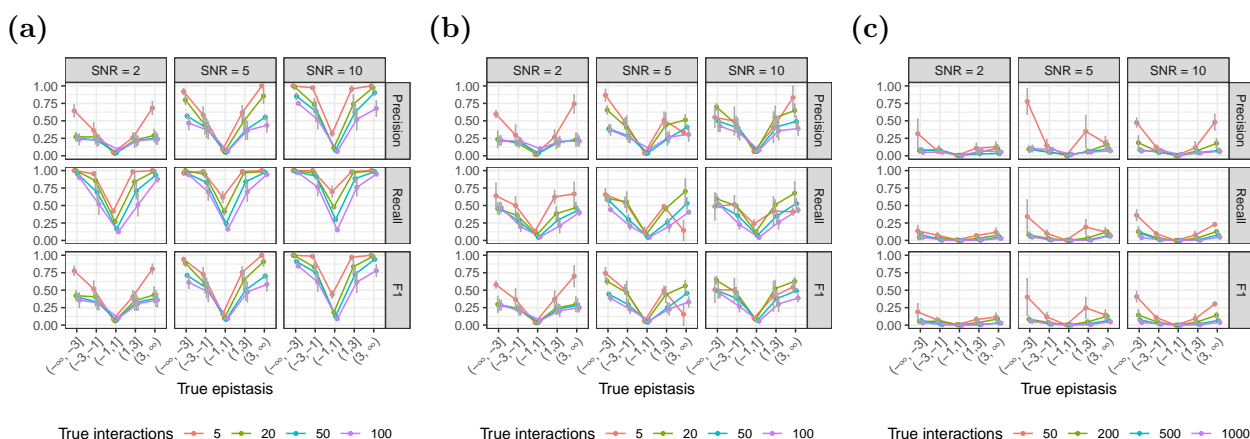

**Figure 19.** Identification of epistasis for varying effect size. Results are for all identified conditional epistasis  $\beta_{i,j} > 0$ . (a) Small ( $p = 100, n = 1000$ ) simulations, using glinternet. (b) Small ( $p = 100, n = 1000$ ) simulations, using xyz. (c) Large  $p = 1000, n = 10000$  simulations, using xyz.

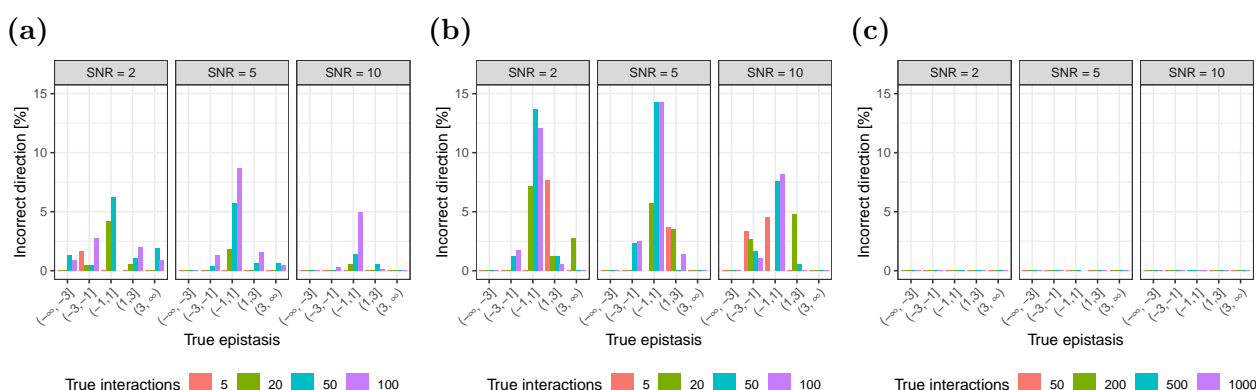

**Figure 20.** Identification of epistasis for varying effect size. Results are for all identified conditional epistasis  $\beta_{i,j} > 0$ . (a) Small ( $p = 100, n = 1000$ ) simulations, using glinternet. (b) Small ( $p = 100, n = 1000$ ) simulations, using xyz. (c) Large  $p = 1000, n = 10000$  simulations, using xyz. Note that in this test there are no incorrect results

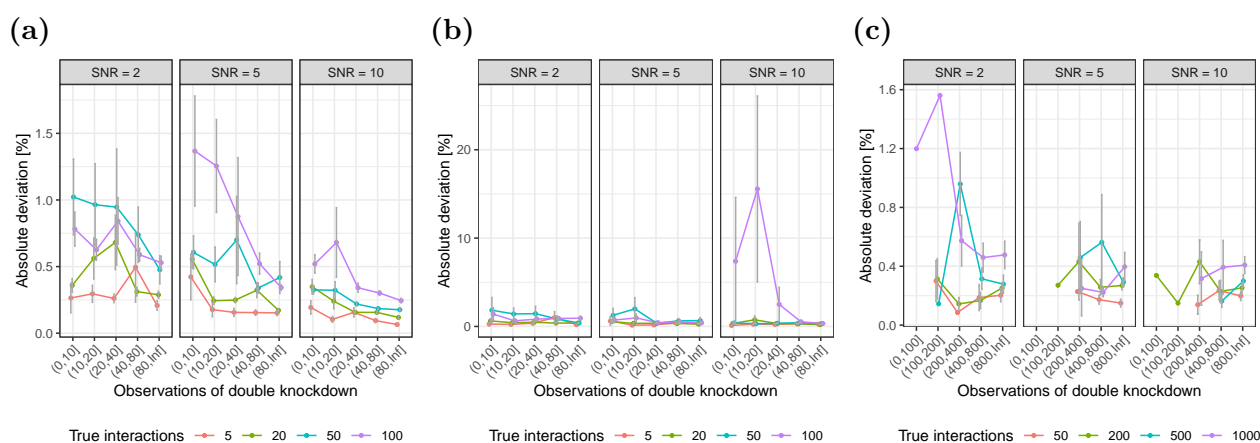

**Figure 21.** Concordance between the magnitude of true and estimated epistasis. Results are for all identified conditional epistasis  $\beta_{i,j} > 0$ . (a) Small ( $p = 100, n = 1000$ ) simulations, using *glinetnet*. (b) Small ( $p = 100, n = 1000$ ) simulations, using *xyz*. (c) Large  $p = 1000, n = 10000$  simulations, using *xyz*.

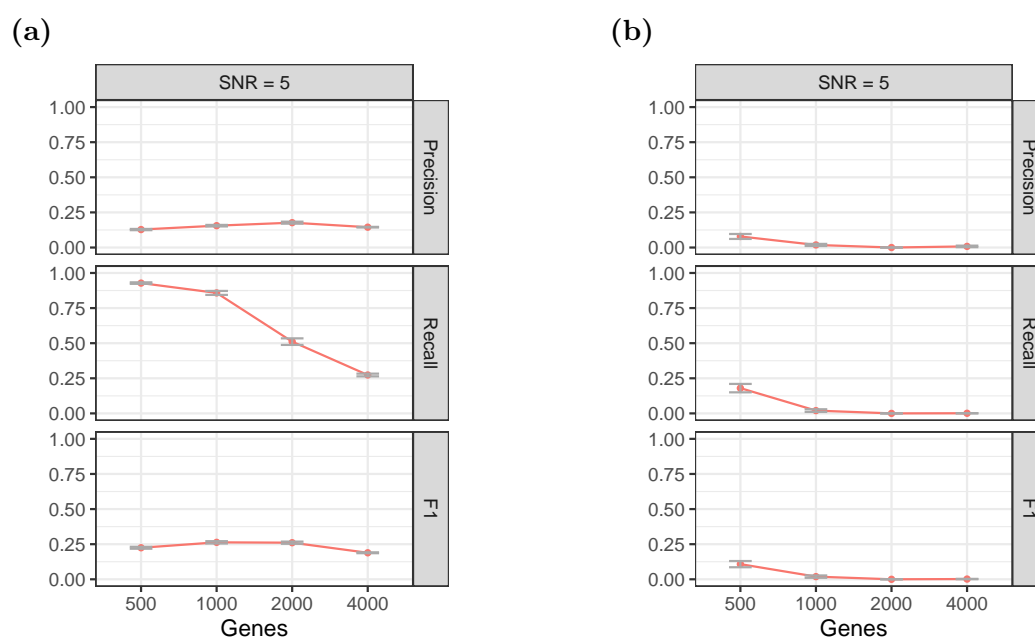

**Figure 22.** The performance of (a) *glinetnet* and (b) *xyz* on increasingly large data sets. Results are for all identified conditional epistasis  $\beta_{i,j} > 0$ .
